# **Toughening mechanisms for the attachment of architected materials: The mechanics of the tendon enthesis**

**Short title: Toughening mechanisms at the tendon enthesis**

## **Authors**

Mikhail Golman<sup>1,2</sup>, Adam C. Abraham<sup>1</sup>, Iden Kurtaliaj<sup>1,2</sup>, Brittany P. Marshall<sup>1,2</sup>, Yizhong Jenny Hu<sup>2</sup>, Andrea G. Schwartz<sup>3</sup>, X. Edward Guo<sup>2</sup>, Victor Birman<sup>4</sup>, Philipp J. Thurner<sup>5</sup>, Guy M. Genin<sup>3,\*</sup>, Stavros Thomopoulos<sup>1,2,\*</sup>

## **Affiliations**

1 - Department of Orthopedic Surgery, Columbia University, New York, NY

2 - Department of Biomedical Engineering, Columbia University, New York, NY

3 - NSF Science and Technology Center for Engineering Mechanobiology, Washington University, St. Louis, MO

4 - Missouri University of Science and Technology, Rolla, MO

5 - Institute of Lightweight Design and Structural Biomechanics, Vienna University of Technology, Vienna, Austria

## **\* Corresponding Authors:**

Stavros Thomopoulos, PhD

Columbia University

Black Building, Room 1408

650 W 168 ST

New York, NY 10032-3702

Phone: 212-305-5124

Email: [sat2@columbia.edu](mailto:sat2@columbia.edu)

Guy M. Genin, PhD

Washington University

1 Brookings Drive

St. Louis, MO 63130

Phone: 314-935-5660

Email: [genin@wustl.edu](mailto:genin@wustl.edu)

37 **Abstract**

38 Architected materials offer tailored mechanical properties but are limited in engineering  
39 applications due to challenges in maintaining toughness across their attachments. The enthesis  
40 connects tendon and bone, two vastly different architected materials, and exhibits toughness  
41 across a wide range of loadings. Understanding the mechanisms by which this is achieved could  
42 inform the development of engineered attachments. Integrating experiments, simulations, and  
43 novel imaging that enabled simultaneous observation of mineralized and unmineralized tissues,  
44 we identified putative mechanisms of enthesis toughening in a mouse model and then  
45 manipulated these mechanisms via *in vivo* control of mineralization and architecture. Imaging  
46 uncovered a fibrous architecture within the enthesis that controls trade-offs between strength and  
47 toughness. *In vivo* models of pathology revealed architectural adaptations that optimize these  
48 trade-offs through cross-scale mechanisms including nanoscale protein denaturation, milliscale  
49 load-sharing, and macroscale energy absorption. Results suggest strategies for optimizing  
50 architecture for tough bimaterial attachments in medicine and engineering.

51

52 **Teaser**

53 The architecture of the tendon-to-bone attachment is designed for toughness.

## 54 **Introduction**

55       Materials whose micro- and meso-scale architectures endow them with useful mechanical  
56 functions are found throughout nature and, more recently, in engineering (*1–4*). However,  
57 engineering application of such architected materials is limited by the challenge of attaching  
58 them (*5*). Typical features of architected materials (e.g., microtruss composites) lead to local  
59 elevations in stress that can reduce strength (i.e., stress required to break the material) and  
60 toughness (i.e., the energy absorbed prior to breaking the material) when they are connected to  
61 other materials (*6, 7*). Natural materials provide a rich source of inspiration for the design and  
62 attachment of architected engineering materials. For example, the tendon enthesis illustrates a  
63 number of novel and often counter-intuitive ways by which architected materials can be  
64 effectively connected. Tendon and bone, tissues with a two orders-of-magnitude difference in  
65 modulus, display a hierarchical architecture ranging from nanometer-scale triple-helix  
66 tropocollagen molecules to sub-micrometer-diameter fibrils to 10-100 micrometer-diameter fibers  
67 that extend over millimeters (*8*). Across species, strong attachment of tendon and bone arises  
68 from a zone of compliant transitional tissue (*9, 10*) that mitigates stress concentrations through  
69 allometric scaling of geometry (*11*) and through functional gradations of both fiber orientation  
70 (*12, 13*) and bioapatite mineral (*14–17*). These aspects of enthesis architecture are not recreated  
71 following injury, and surgical repairs thus often fail (*18, 19*). Despite progress in understanding  
72 how the enthesis achieves a strong attachment under sub-damage loading regimes, it remains  
73 unclear how toughness is achieved to prevent interfacial failure. Understanding these mechanisms  
74 will guide engineering and medical approaches to bimaterial attachment.

75       We therefore aimed to identify enthesis architectural and compositional toughening  
76 mechanisms in mice using imaging, biomechanical testing, and mathematical modeling. A novel  
77 micro computed tomography (microCT) technique was developed to simultaneously visualize the  
78 mineralized and unmineralized fibrous networks within the tendon-bone attachment at sub-

79 micrometer resolution. We manipulated the fibrous network through pathophysiologic loading *in*  
80 *vivo* in a mouse model and quantified how monotonic (acute) and cyclical (degenerative) loading  
81 affected enthesis strength and toughness. Biomechanical analysis and numerical simulation  
82 supported our hypothesis that architectural toughening arises from the composition (nanoscale  
83 mineral and proteoglycans), structure (microscale collagen organization and recruitment), and  
84 position (macroscale loading angle) of the transitional material. Physiologically, enthesis  
85 composition and micro-structure *in vivo* adapted to loading in a way that revealed a trade-off  
86 between strength and toughness. These features of the adaptable, architected, fibrous enthesis  
87 have direct implications for tough attachment between dissimilar materials, facilitating improved  
88 design of surgical and tissue engineered solutions for tendon-to-bone repair.

89

## 90 **Results**

### 91 **Attachment at the enthesis relies on a fibrous architected material system**

92 Using microCT imaging with mercury (II) chloride staining, we obtained simultaneous,  
93 sub-micrometer imaging of unmineralized and mineralized tissue in the mouse supraspinatus  
94 tendon enthesis (Fig. 1A) and discovered that the function of the enthesis had been previously  
95 misunderstood. Hidden within the well-known attachment footprint (*II*) (Fig. 1B within blue  
96 dotted line) was a smaller, denser “primary” insertion site where tendon fibers directly inserted  
97 into bone over  $30\% \pm 3.5\%$  of the footprint area (Fig. 1C, within green dotted line, FigS1, Movie  
98 S1). Collagen fibers were continuous from muscle to bone but branched into smaller diameter  
99 fibers as they inserted into bone on one end, as previously described (9, 20), or muscle at the  
100 other.

101 To test the hypothesis that the primary insertion site was responsible for load transfer, we  
102 stretched supraspinatus tendon enthesis specimens to failure quasi-statically. The enthesis failed  
103 through avulsion of a bone plug (Fig. 1C) over  $22.4\% \pm 6.2\%$  ( $0.31 \pm 0.09 \text{ mm}^2$ ) of the apparent

04 insertion site (Fig.S1C), with the majority of the primary insertion avulsed, but with peritenon  
05 tissue surrounding the primary insertion site still attached (Fig. S2A, Movie S2). Failure occurred  
06 catastrophically, with little resistance to post-failure force (Fig. S2B), supporting our hypothesis.

07 We next asked how the primary insertion resisted failure loads. Although failure was  
08 expected at the mineralized interface within fibrocartilage where the stress concentrations were  
09 predicted to occur (21, 22), this was not observed, indicating mechanisms to alleviate these stress  
10 concentrations. Failure occurred either at the interface between mineralized fibrocartilage and  
11 bone (MF-B failure type), or within trabecular bone (B-T failure type) (Fig. 1 C - I; Fig. S3A,  
12 Movie S3) and in all cases with crack propagation around the avulsion site (scanning electron  
13 microscopy, Fig. 1J and Fig. 3SB). For this loading, the fibrous primary enthesis was thus tougher  
14 than cortical bone, with the more compliant fibrocartilage storing enough energy to fracture and  
15 avulse bone.

## 17 **Multiscale toughening mechanisms enable resistance to cyclical loading**

18 The enthesis is durable against the complex and repeated loadings of daily activities (23), but  
19 failure mechanisms change with loading regime and age. Avulsions are common in high-impact  
20 injuries for pediatric patients (24), but rupture at the tendon end of enthesis is prominent in  
21 degenerated rotator cuffs of adult patients (25–27). We therefore hypothesized that toughening  
22 mechanisms depend upon the loading regime.

23 In response to acute loading (monotonic tension across a range of loading rates) or fatigue  
24 loading (cyclic loading at 2 Hz, either 1-20 % or 20-70% failure load), three distinct failure  
25 modes were observed (Fig. 2 A-E): bone avulsion, tendon mid-substance failure, and tendon-bone  
26 interface failure. Acute loading led primarily to avulsion, regardless of loading rate. Although

27 entheses mechanical properties were largely strain-rate insensitive, like tendon properties (28, 29),  
28 strength (failure load) and toughness (work to failure, calculated as the area under the force-  
29 displacement curve) increased at higher strain rates by as much as 1.4-fold ( $p<0.0001$ ) and 1.6-  
30 fold ( $p<0.01$ ), respectively, compared to that of control test case ( $n=10-12$ /case, Fig. 2 C and D;  
31 Fig.S4 A-C). Notably, the area and number of fragments of the avulsed region increased with  
32 loading rate (Fig. S4 C-F). In contrast to acute loading, all cyclically loaded samples (High: 2 Hz,  
33 20-70% of strength) failed in the unmineralized fibrocartilage portion of the attachment  
34 (“insertion failure”, Fig 2E). Samples cyclically loaded at lower, physiologically relevant loads  
35 (Low: 2Hz, 1%-20% of strength), did not fail, even after 100,000 cycles (Fig. 2E), indicating that  
36 these loading levels were under the entheses fatigue limit. Results thus suggested that the  
37 mechanisms protecting fibrocartilaginous entheses tissue might be gradually attenuated under  
38 sufficiently severe cyclical loading.

39 To identify potential nanoscale mechanisms that could explain this behavior, we  
40 quantified molecular damage under the various loading regimes using fluorescein-labeled  
41 collagen hybridizing peptide (F-CHP) (30, 31). Whole-sample imaging of F-CHP fluorescence  
42 intensity, indicative of collagen damage, increased with applied load or number of cycles (Fig.  
43 2F, top). In monotonic loading, fluorescent signal accrued near the primary insertion site when  
44 loads exceeded 3 N. Under cyclic loading, signal was concentrated in a few fibers near the tendon  
45 mid-substance between 10,000 and 40,000 cycles, then propagated down the entire tendon in  
46 concentrated bands (Fig. 2F, bottom). This revealed that, in monotonic loading to failure, energy  
47 sufficient to avulse bone was stored in the entheses with relatively little energy dissipation, while  
48 in cyclical loading, energy was absorbed by damage within the tendon and entheses, eventually  
49 leading to failure within the unmineralized tissues. Thus, the entheses contains fiber-level  
50 toughening mechanisms to resist monotonic loading and an underlying nanoscale mechanism to  
51 resist cyclical loading.

52

### 53 **Differential recruitment of collagen fibers enables toughness across loading directions**

54       Based upon observations of the fibrous character to the enthesis, we hypothesized that  
55 these nanoscale mechanisms are supplemented by macroscale toughening mechanisms to resist  
56 failure across a range of directions (i.e., shoulder abduction angle, Fig. 3A-B). Enthesis behavior,  
57 including strength and stiffness, varied with the angle of abduction (Fig. 3C-F). This was a  
58 surprise given the shoulder's ability to resist injury across its broad range of motion (32). HgCl<sub>2</sub>-  
59 enhanced microCT images revealed that fibers engaged or buckled depending upon loading (Fig.  
60 3B top, Fig.S5A), consistent with fiber recruitment models of tendon mechanics (33) and rotator  
61 cuff injury (26). We therefore developed a series of experiments and models to determine how  
62 abduction-dependent fiber architecture and recruitment dictated enthesis mechanics.

63       Imaging at 5  $\mu\text{m}$  resolution revealed that the collagen fibers of the supraspinatus tendon  
64 enthesis engaged at low abduction angles (0° and 30°) and buckled at high abduction angles (90°  
65 and 120°) (Fig. 3B, top row outlined in blue, Video S4). Furthermore, imaging at 0.75  $\mu\text{m}$   
66 resolution confirmed that outer (bursal-side) fibers were longer than inner (articular-side) fibers  
67 (Figure 3B, bottom row and Fig.S5A), as similar to what previously described in human (34, 35).  
68 This indicated that both inner and outer fibers engaged to carry loads at low angles of abduction,  
69 but only inner fibers engaged at high angles, with outer fibers remaining slack.

70       We then explored whether these changes in microscale fiber engagement with shoulder  
71 abduction could explain the observed macroscale adaptations in tendon enthesis toughness and  
72 strength using a numerical model (Supplemental Text). The model idealized the geometry of the  
73 humeral head as a circular bone ridge beneath linear elastic fibers of pre-defined thickness and  
74 spacing. Fibers engaged, re-oriented, and contacted neighboring fibers or the humeral head during

75 loading (Fig. 3A bottom, Fig. 5SB) in a way that varied with abduction, and that reproduced  
76 trends observed in our experiments (Fig. 3G and H): normalized strength and toughness increased  
77 with decreasing abduction angle, while stiffness decreased with decreasing abduction angle.  
78 These results thus supported the hypothesis that abduction-dependent fiber recruitment was a  
79 factor in failure patterns, with the displacement needed to engage (recruit) all fibers lowest at 60°  
80 of abduction (Fig. 3I), and four times higher at 120° than at 90° of abduction. When considering  
81 failure behavior across the physiological range of shoulder abduction (Fig. 3J), strength decreased  
82 with abduction angle from 90° to 0°, while toughness increased; strength and toughness decreased  
83 dramatically beyond 90° of abduction.

84 From the perspective of shoulder physiology, results inform our understanding of rotator  
85 cuff injury. Acute tears in baseball players typically occur in the late-cocking/follow-through  
86 phases of pitching (high abduction angles, ~110°) (36), consistent with our observations of acute  
87 failure via bony avulsion, with size of fractured area lowest at low angles of abduction ( $p < 0.01$ ,  
88 FigS6). Rotator cuff tendon tears most commonly initiate on the articular side of the tendon (25,  
89 26), consistent with predictions that inner-most fibers engage and fail first at every abduction  
90 angle simulated.

91 The fibrous architecture of the tendon enthesis enabled its fibers to reorient, recruit, and  
92 subsequently rupture to balance strength and toughness across a wide range of motion, a tradeoff  
93 well known in material design (7). The healthy enthesis appeared optimized for toughness, with  
94 gains in toughness associated with changing abduction angle achieved through comparably  
95 modest losses in strength (Fig 3J). This is somewhat analogous to brittle matrix fibrous  
96 composites achieving toughness at the expense of strength (17, 37), and how microscale  
97 interdigitation of the tendon enthesis toughens attachments (15). The trade-off was particularly  
98 apparent at lower abduction angles, where rotator cuff muscles were most engaged and enthesis



99 loads were highest (38). Although factors such as viscoelasticity and post-yield behavior also  
100 contribute to enthesis toughness, the current modeling and experimental results support a clear  
101 role for abduction position-dependent kinematics driving tendon enthesis toughness in the rotator  
102 cuff.

103

#### 104 **Tendon enthesis strength is determined by mineral composition**

105 A spatial gradient in mineral stiffens the enthesis, especially beyond a percolation  
106 threshold (39), and mitigates stress concentrations (40). Proteoglycans stiffen and provide energy  
107 dissipation in articular cartilage (41). To test the hypothesis that these extracellular matrix  
108 components also contribute to enthesis toughness, each was chemically removed from the  
109 enthesis prior to mechanical testing (Fig. 4A, Fig.S7). We hypothesized that removal of mineral  
110 would reduce stiffness and strength, and that removal of proteoglycans would reduce toughness.

111 Removal of mineral or proteoglycan did not significantly alter failure modes under  
112 monotonic loading; samples failed primarily via bone avulsion, with 20% (2/10 samples) of  
113 mineral depleted samples failing at the insertion (Fig. 4B, Fig. S8A and B). As hypothesized,  
114 removal of mineral decreased strength and stiffness ( $p < 0.0001$ , Fig. 4D and Fig.S8C), but also  
115 decreased toughness ( $p < 0.0001$ , Fig. 4E). Contrary to the hypothesis, removal of proteoglycans  
116 did not change toughness, although decreases in strength and stiffness were observed, which were  
117 in agreement with prior findings at the scale of collagen fibrils (42). Of note, the proteoglycan  
118 depletion protocol used here removed proteoglycan in the unmineralized portion of the enthesis  
119 only (Fig. S7B), and therefore proteoglycan-mineral interactions cannot be ruled out.  
120 Nevertheless, results demonstrate that mineral content is crucial for enthesis strength and  
121 toughness.

22

23 **The tendon enthesis actively adapts its architecture *in vivo* by controlling mineral**  
24 **composition and microarchitecture**

25 It is well known that bone (43, 44) and entheses (45) respond to loading by adapting their  
26 mineral content. To further elucidate how composition and architecture are modulated at the  
27 enthesis *in vivo* to produce toughness, we varied the loading environment of mouse shoulders via  
28 botulinum toxin A-induced underuse/paralysis or treadmill-induced overuse (Fig. 5A). We  
29 hypothesized that modifications to *in vivo* loading would lead to architectural adaptations that  
30 control strength and toughness.

31 Regardless of treatment, all specimens failed via avulsion under monotonic loading (Fig.  
32 5B). Healthy and overuse-degenerated attachments failed catastrophically, showing little post-  
33 yield behavior, while underuse-degenerated attachments failed at lower forces and showed  
34 distinct post-yield behavior (Fig. 5C). Pathologic loading led to distinct changes to enthesis  
35 failure pattern. Underuse increased fracture area by as much as 1.9-fold compared to that of  
36 control ( $p < 0.01$ , Fig. 5D). While overuse-degenerated entheses failed primarily with one bony  
37 avulsed fragment, failures in underuse-degenerated attachments showed multiple fragments of  
38 avulsed bone (Fig. 5E). Overuse and underuse led to a shift in the fracture location: overuse  
39 resulted in more failures at the MF-B interface while underuse resulted in more failures at the B-T  
40 interface (Fig. 5F). Both overuse and underuse reduced toughness, but via different mechanisms.  
41 Overuse did not affect tendon enthesis strength (Fig. 5G) but led to an increase in stiffness  
42 ( $p < 0.01$ , Fig. 5H), resulting in ~30% decrease in toughness ( $p < 0.05$ , Fig. 5I). In contrast, underuse  
43 led to a decrease in strength ( $p < 0.01$ , Fig. 5G) and a decrease in stiffness ( $p < 0.05$ , Fig. 5H),  
44 resulting in a decrease in toughness ( $p = 0.08$ , Fig. 5I). Hence, Loss in toughness in overuse  
45 entheses was associated with reduced displacement at failure, without a change in strength; loss in

46 toughness in underuse entheses was associated with reduced strength at failure, without a change  
47 in failure displacement.

48 To investigate the architectural adaptations underlying these effects, we characterized  
49 changes in the bone underlying the tendon enthesis. Bone morphometric analysis revealed that  
50 overuse led to up to 9% gain of bone volume in the humeral head (BV/TV,  $p < 0.01$ , Fig. 5K),  
51 while underuse led to up to 24% loss in bone volume in the humeral head (BV/TV,  $p < 0.0001$ ,  
52 Fig. 5K) and up to 22% loss of bone mineral density underlying the attachment (BMD,  $p < 0.0001$ ,  
53 Fig. 5L). Study of individual trabecula, via three-dimensional segmentation of the trabecular  
54 network into rods and plate microarchitectures (46), showed that overuse increased the volume of  
55 load-bearing trabecular plates (pBV/TV) as much as 22% ( $p < 0.0001$ ), while underuse decreases  
56 this as much as 30% ( $p < 0.0001$ ) (Fig. 5M). Overuse increased the thickness ( $p < 0.01$ ) of  
57 individual trabeculae 30%, while underuse decreased the number of trabecular plates by 15%  
58 ( $p < 0.0001$ , Fig. S10). The trabecular network of healthy, cage-active control samples had the  
59 highest density of trabecular plates oriented at  $90^\circ$ - $60^\circ$  relative to the dominant fiber direction in  
60 the supraspinatus tendon, and the lowest density of trabecular rods oriented in this range (Fig. 5N,  
61 Fig. S11). With overloading, trabecular plate density increased in  $60^\circ$ - $30^\circ$  ( $p < 0.05$ ) and  $30^\circ$ - $0^\circ$   
62 ( $p < 0.01$ ) ranges, and with underuse, trabecular plate and rod loss occurred uniformly across all  
63 directions ( $p < 0.05$ ). These results demonstrate that overuse loading prompted active  
64 reinforcement whereas underloading prompted active removal of the trabecular architecture  
65 underneath the enthesis. Thus, the architecture of the bony structure at the tendon enthesis  
66 oriented to support and share the load into orientations of relatively low enthesis strength and  
67 toughness.

58 To understand which architectural features drove enthesis mechanical behavior, we  
59 correlated enthesis failure properties to bone and tendon microarchitecture using Pearson

70 correlation (Fig. 5O and Fig. S12). Enthesis strength correlated strongly with BMD ( $R=0.60$ ,  
71  $p<0.001$ ), cortical thickness ( $R=0.69$ ,  $p<0.001$ ), and trabecular plate thickness ( $R=0.59$ ,  $p<0.001$ ),  
72 but not with tendon cross-sectional area. Enthesis toughness correlated strongly with tendon  
73 cross-sectional area ( $R=0.43$ ,  $p<0.05$ ), and trended with mineralized fibrocartilage volume  
74 ( $R=0.30$ ,  $p=0.11$ ). These results are consistent with clinical findings that the loss of mineralized  
75 tissue at the attachment site correlates with higher rates of re-tearing following surgical repair  
76 (47).

77

## 78 **Discussion**

79 This study revealed architectural toughening mechanisms at the enthesis, providing  
80 guidance for attachment of dissimilar materials (Fig. 6). First, energy storage in a compliant  
81 region of the fibrous attachment was protective, precluding fracture of the intricately architected  
82 transitional tissue and instead leading to fracture of more easily regenerated bone. While  
83 counterintuitive, a tough, architected compliant material attaching two dissimilar materials  
84 occurs across nature, e.g., in nacre (48), tooth enamel (49), and some mollusks (50). Compliant  
85 attachment layers in engineering have also been used in bottom-up and top-down fabrication of  
86 architecture materials (6), such as PMMAs inserted in between alumina layers (51), to absorb  
87 energy and channel crack propagation, and polymeric foams inserted into metallic foams (52).

88 Second, the tendon enthesis harnesses its fibrous nature for effective load transfer.  
89 Nanoscale energy absorption by collagen molecules resists fatigue loading, while milliscale  
90 network behavior enables fiber reorientation, recruitment, and load sharing for toughness across  
91 loading directions. A similar concept has been applied to topologically interlocked material  
92 panels, with failure shared across contiguous panels and localized to repairable regions (53, 54).  
93 Distributions of fibers are further optimized at the enthesis to harness the toughness of the entire

94 fibrous network at all loading directions, and to provide enhanced stiffness in the loading  
95 conditions for which muscle forces are highest. This relatively simple mechanism provides a  
96 principle that can be readily harnessed for engineering.

97 Additional features of the enthesis that will be more difficult to harness in engineering are  
98 compositional adaptations of architecture to physiologic loading. *In vivo* loading models revealed  
99 bony architecture actively remodeling to maintain strength along the axis of loading, while  
100 compromising overall toughness. Microstructural heterogeneity that toughens fibrous interfaces  
101 (8, 37) derives in part from mineral nanocrystal reorganization and reorientation (16) but  
102 controlling these factors, as well as potential mineral binding proteins such as proteoglycans (55)  
103 and osteopontin (56), is currently beyond the scope of current top-down and bottom-up  
104 manufacturing techniques. Our findings demonstrated how the tendon enthesis achieves a  
105 remarkable balance between strength and toughness through its architecture to resist injurious  
106 loads. The toughening mechanisms identified here for the tendon enthesis provide guidance for  
107 improving enthesis surgical repair and enthesis tissue engineered scaffolds, as well as approaches  
108 for attachment of architected engineering material systems.

109

## 110 **Materials and Methods**

### 111 **Sample preparation and study workflow**

112 All animal procedures were approved by the Columbia University Institutional Animal Care and  
113 Use Committee. Supraspinatus tendon-to-bone attachment units (humerus-supraspinatus tendon-  
114 supraspinatus muscle) were harvested from adult (>12 weeks) male C57BL6/J mice (n = 275).  
115 After dissection, samples were fresh-frozen in PBS and stored at -20°C. The experimental  
116 workflow was dependent on two categories: (1) unloaded/intact sample characterization (2)  
117 loaded sample characterization. For unloaded-sample characterization, defrosted samples were  
118 subjected to initial experimental protocol described in the sections below (i.e., secured at  
119 appropriate angle of abduction or chemically digested) and imaged via contrast enhanced

20 microCT or via light microscopy, as the imaging techniques were terminal. For characterizing  
21 samples undergoing loading, defrosted samples were first scanned by conventional microCT  
22 before subjected to experimental protocol and mechanical testing. After mechanical testing,  
23 samples were secured at terminal displacements and either submerged in a 5% mercury chloride  
24 ( $\text{HgCl}_2$ , Sigma-Aldrich) or fixed with 4% paraformaldehyde (Sigma-Aldrich) to analyze for  
25 macroscopic and fiber network level damage or molecular level (collagen) damage.

26

### 27 **Mechanical testing**

28 All samples were mechanically tested in a saline bath at 25°C to prevent thermal collagen  
29 denaturation on a table-top tensile tester (Electroforce 3230, TA Instruments) fitted with 10 lb.  
30 load cell (TA instruments). Before testing, the supraspinatus muscle was carefully removed from  
31 supraspinatus-humerus unit. Samples were placed into custom 3D-printed fixtures (57) and  
32 supraspinatus tendon were secured between two layers of thin paper (Kimwipe) with a drop of  
33 cyanoacrylate adhesive (Loctite, Ultra Gel Control) before mounting onto custom grips. Samples  
34 were secured in fixtures and tested in an orientation corresponding to 90° shoulder abduction  
35 unless otherwise noted. Specifically, to identify positional contributions to enthesis toughness,  
36 samples were fitted to 3D-printed fixtures that secured samples in an orientation corresponding to  
37 various angles of abductions (0°, 30°, 60°, 120°, n=10 per angle). For all mechanical testing  
38 protocols, samples were first pre-loaded to 0.05 N, pre-conditioned by applying 5 cycles of  
39 sinusoidal wave consisting of 5% strain and 0.2%/s, and rested for 300 seconds. The unloaded  
40 control group consisted of samples that were prepared and mounted in the mechanical tester, but  
41 not loaded (n=5).

42 Quasi-static and monotonic uniaxial loading: post pre-loading, pre-conditioning, and rest,  
43 samples were strained in tension at 0.2 %/s to failure (for all loading conditions unless specified  
44 otherwise below). The healthy failed control samples (CTRL) were healthy adult enthesis samples

45 strained in tension at 0.2 %/s to failure in an orientation corresponding to 90° abduction. For the  
46 interrupted testing, samples were strained in tension at 0.2 %/s to 1 N, 2 N, 3 N (n=3 per rate). To  
47 examine the role of strain rate in enthesis failure, samples were tested under three additional strain  
48 rates (2 %/sec, 20 %/sec, 200 %/sec, n=10 per rate) until failure. Fatigue loading: after pre-  
49 loading and preconditioning, samples were either subjected to 2 Hz sinusoidal loading from 0.1-1  
50 N (1%-20% of failure force, n=4) or 1-3 N (20-70% of failure force, n=5). To investigate  
51 molecular level damage localization in the entheses, additional samples were loaded to 10,000  
52 cycles (n=3), 40,000 cycles (n=3), and to failure (> 50,000 cycles, n=5) using the second protocol  
53 (20-70% max failure force).

54       Enthesis structural properties, such as failure load (referred to as strength in text),  
55 stiffness, and work to failure (area under the curve through failure load, referred to as toughness  
56 in text) were determined from load-deformation curves. Stiffness was calculated by a MATLAB  
57 (Matlab2019a, MathWorks) custom algorithm that identifies the best fitting line within a  
58 sufficient bin width (i.e., remove data below 10% of max load and above 95% of max load) by  
59 implementing the random sample correlation (RANSAC) technique (58).

50

### 51 **Contrast enhanced and conventional micro computed tomography (microCT) imaging**

52 Simultaneous visualization of soft and hard tissues of tendon enthesis samples were achieved by  
53 staining samples with 5% mercury chloride solution prior to scanning with microCT. A 5%  
54 mercury chloride solution was prepared fresh for each experiment day by dissolving Mercury (II)  
55 chloride (HgCl<sub>2</sub>, Sigma-Aldrich) in distilled and de-ionized water (MilliQ water,  
56 MilliporeSigma) at room temperature until the saturation was achieved. Tendon enthesis samples,  
57 either intact or post-mechanical testing, were submerged in this solution for 24 hours and washed  
58 three times in distilled and de-ionized water for 10 minutes each before they were imaged with  
59 microCT (Skyscan 1272, Bruker).

70 We used the same preparations and scan settings when visualizing enthesis samples with both  
71 conventional and contrast enhanced microCT. To prepare for scanning, distal end of  
72 supraspinatus-humerus unit were embedding in 2% agarose (Sigma-Aldrich) and mounted in the  
73 scanning chamber, so that tendon enthesis specimens were hung loosely and in line with the  
74 scanning axis. To visualize enthesis samples at specific angles, we used 3D printed fixtures that  
75 fixed the samples in the appropriate position when they were mounted in the scanning chamber.  
76 Scans were performed with 60kVp, 166uA, and Al 0.5mm filters with isometric resolution of 2.5  
77  $\mu\text{m}$ . To visualize enthesis insertions and failure surfaces, high resolution images were obtained at  
78 0.75  $\mu\text{m}$  resolution, while for whole joint imaging images were obtained at 5  $\mu\text{m}$  resolution. The  
79 acquired microCT data were reconstructed with the software (nRecon, Bruker) provided with the  
80 CT scanner using alignment optimization and beam-hardening correction. The reconstructed  
81 image data was visualized with built-in program (DataViewer and CTvox, Bruker).

82

### 83 **Scanning Electron Microscopy (SEM)**

84 Failed tendon enthesis samples (n=10) were dried at 37 °C, fixed on SEM aluminum pin mounts  
85 using carbon tape and silver paint and carbon-coated (30 nm). Prepared samples were imaged by  
86 scanning electron microscope (FEGSEM, Quanta 250F, FEI Company, Hillsboro, OR, USA) in  
87 backscattered electron mode using a concentric backscattered detector and acceleration voltages  
88 of 5-15 KV at a working at different magnifications from 250x to 20,000x. SEM was carried out  
89 using facilities at the University Service Centre for Transmission Electron Microscopy, TU Wien,  
90 Austria.

91

### 92 **Tendon cross-sectional area, mineralized fibrocartilage area, footprint area, insertion area,** 93 **and failure area determination**



94 Conventional and contrast enhanced microCT scans of murine tendon enthesis samples were  
95 analyzed to determine minimal tendon cross-sectional area, mineralized fibrocartilage (MFC)  
96 area, enthesis footprint area, insertion area, and failure area. The minimum tendon cross-sectional  
97 area and mineralized fibrocartilage area for each sample was determined from conventional  
98 microCT scans that were performed on samples prior to mechanical testing (or prior to staining  
99 with HgCl<sub>2</sub>) and analyzed via built-in image processing algorithms (CTAn, Bruker). Minimum  
100 cross-sectional tendon area was determined by thresholding the transverse slices through the  
101 tendon, calculating the area encompassing the tendon, and selecting the smallest area of a tendon  
102 that is within 500µm from the tendon insertion site. MFC volume was determined by contouring,  
103 thresholding, and integrating all the areas of MFC from sagittal slices of humeral head. Since the  
104 absorption coefficients of the MFC was in between that of tendon and bone, and did not change  
105 significantly between samples, a single range of threshold values was selected to identify and  
106 estimate volume of the MFC.

107 Apparent footprint area, insertion area, and failure area were estimated using HgCl<sub>2</sub> stained  
108 contrast enhanced microCT images of enthesis samples, as the imaging technique allows for  
109 differential absorbance coefficients between each tissue selected. Since the regions of interest  
110 were along the curved volume (i.e., humeral head), we developed a custom semi-automated  
111 MATLAB (Matlab2019a, MathWorks) routine that calculates the overlapping polyhedron surface  
112 meshes from two arbitrary volumes (e.g., humeral head and tendon enthesis) from the same  
113 imaging dataset. The first region represents the surface of the bone: either the surface of the  
114 humeral head (for calculating footprint area or insertion area), or the surface of avulsed pieces  
115 (for calculating failure area). This region was obtained by thresholding and semi-automatically  
116 contouring via shrink-wrapping algorithm built-in to the manufacturers' imaging processing  
117 software (CTAn, Bruker). The second region for calculating *footprint area* or *insertion area*  
118 represents volume of the tendon enthesis that intersects with the surface of the humeral head

19 along the edge of the tendon attachment. The second region for calculating *the failure area*  
20 represents a volume that contains only the fractured surface of the avulsed piece. The edges of the  
21 second region for in both cases were determined visually by an experienced researcher by  
22 manually contouring appropriately slices for each region of interest. The output volume sets were  
23 triangularly meshed to determine the surface area between the overlapping volumes.

24

## 25 **Collagen damage visualization**

26 Unloaded and loaded tendon enthesis samples allocated for analyzing molecular-level collagen  
27 damage were stained with F-CHP (3 Helix) and visualized via fluorescence microscopy. Post  
28 mechanical testing, samples were first secured and fixed at their appropriate displacements with  
29 4% paraformaldehyde (PFA, Fisher Sci) overnight. Tendon enthesis samples were washed 3 times  
30 in PBS for 10 min each at room temperature. After washing, each tendon enthesis sample was  
31 placed in a tube containing 450  $\mu$ l of PBS solution. F-CHP staining protocol was adapted from  
32 what have described previously in staining rat tendon fascicles (31). CF-CHP stock solution (150  
33  $\mu$ M) was heated at 80 °C for 10 min to thermally dissociate trimeric CHP to a monomeric state  
34 and quenched in ice bath for approximately 20 seconds to prevent artificial thermal damage to  
35 samples. 50  $\mu$ l of monomeric CF-CHP were then added to a tube containing tendon enthesis  
36 sample, resulting in a final F-CHP concentration of 15  $\mu$ M. Samples were incubated for overnight  
37 at 4°C and washed in PBS 3 times for 30 min in a room temperature to remove any unbound F-  
38 CHP molecules. Stained samples were mounted on a glass slide and imaged and captured using  
39 an automated ZEISS Microscope (10x objective, excitation at 488nm channel). Images were  
40 captured by CCD camera using the built-in image acquisition and stitching features and analyzed  
41 with ZEN lite software (ZEISS).

42

### 43 **Positional recruitment model**

44 We consider  $N$  linear elastic fibers of thickness  $t$ , each spaced a distance  $s$  apart, beginning with a  
45 fiber that is immediately to the left of a circular bone ridge of radius  $R$ . When the grip is turned at  
46 an angle  $\theta$  to represent positional change, fibers are stretched in that direction. We incorporated  
47 three assumptions in building the positional recruitment model as were suggested by the contrast-  
48 enhanced imaging results: (1) the outer (bursal side) fibers longer than the inner (articular side)  
49 fibers, making the innermost fiber ( $n=1$ ) shortest; (2) tendon fibers are buckled at high angles of  
50 abduction; (3) to simplify, fibers were assumed to be elastic, brittle, and frictionless. During  
51 loading, fibers engage, re-orient, and, depending on loading direction, contact its neighbor fibers  
52 (or the humeral head) due to curvature of the humeral head (Fig.3a, FigS5). The contact point is  
53 determined for each fiber at  $\vec{r}_1^n = R^n(-\cos \phi_1^n \hat{i} + \sin \phi_1^n \hat{j})$ , where the radius of the centerline of  
54 the wrapped fiber is  $R^n = R + (n - 0.5)t$  and the contact angle is  $\cos \phi_1^n = R^n/x_0^n$ . The angle  
55  $\phi_2^n$  at which contact is lost is determined by the innermost fiber, which always stays in tension.  
56 Contact is lost at the point  $\vec{r}_2^n(t)$  at which the unit vector between  $\vec{r}_2^n(t)$  and the connection point  
57 on the grip for the strand,  $\vec{r}_3^n(t)$ , is tangent to the circle formed by the midline of fiber  $n$ . Using  
58 this we can determine the maximum length of a fiber when it is engaged:

$$59 \quad L_{en}^n(t) = \|\vec{r}_1^n - \vec{r}_0^n\| + (\phi_2^n(t) - \phi_1^n)R^n + \|\vec{r}_3^n(t) - \vec{r}_2^n(t)\|$$

60 when a fiber is engaged and contact the bone ridge. If a fiber is engaged, but does not contact the  
61 bone ridge (when  $\phi_2^n(t) < \phi_1^n$ ):

$$62 \quad L_{en}^n(t) = \|\vec{r}_3^n(t) - \vec{r}_0^n\|.$$

63 We generated load-displacement curves from this position dependent fiber kinematic model.  
64 Expanded details on the positional recruitment model can be found in the supplemental document  
65 (Supplementary Text).

66

## 57 **Removal of extracellular matrix components**

58 Glycosaminoglycans (GAGs) from the tendon enthesis samples were chemically digested by  
59 adapting a chondroitinase ABC (ChABC) treatment protocol, which is known to degrade GAG  
60 chains from tendon (59). After conducting a series of concentration and time dependent tests  
61 (results not shown), we determined that 0.5 U/mL was an optimum concentration for ChABC for  
62 digesting GAGs from tendon enthesis samples. In this protocol, whole samples (humerus-  
63 supraspinatus tendon-supraspinatus muscle units) were incubated for 5 days in 2mL of 0.5 U/mL  
64 chABC buffered solution (the buffer solution consists of 50 mM Tris, 60mM sodium acetate,  
65 0.02% bovine serum albumin). After 5 days, digested samples were washed in 1xPBS solution 3  
66 times for 30 minutes before subjecting them to microCT imaging and quasi-static mechanical  
67 testing. To evaluate the efficiency of ChABC treatment, we performed histological analysis on  
68 some samples instead of mechanical testing. These samples (n=2) were fixed in 4%  
69 paraformaldehyde for 24 hours, decalcified in formic acid (StatLab, Immunocal), dehydrated in  
70 70% ethanol, and embedded in paraffin. 5  $\mu$ m thickness paraffin sections were stained with  
71 Alcian blue using manufacturers protocol (Alcian Blue Stain Kit, Abcam) and imaged via bright  
72 field microscopy with 10 $\times$  and 40 $\times$  objectives.

73 Mineral was chemically removed from the tendon enthesis samples by incubating in 5mL formic  
74 acid (Immunocal, StatLab) for 72 hours. Samples were washed in 1xPBS solution 3 times for 30  
75 minutes before subjecting them to microCT imaging to confirm that all the mineral components  
76 were chemically digested, and then quasi-static mechanical testing.

37

## 38 ***In vivo* degeneration models**

39 10-week old C57BL6/J mice (n=10/group, Jackson Laboratories) were subjected to two *in vivo*  
40 loading models, where the supraspinatus muscle activity was modulated to modify supraspinatus  
41 tendon enthesis loading environment. (1) Underuse-degeneration (underuse) was induced via

92 muscle paralysis by bilaterally injecting 0.2 U (0.1U/10 $\mu$ l per 100 g of body weight) of botulinum  
93 toxin into the supraspinatus muscles. After injections, mice were allowed to free cage activity for  
94 4 weeks. (2) Overuse-degeneration was achieved using downhill treadmill running (overuse) with  
95 an initial rate of 17 cm/s for 10 minutes followed by 25 cm/s for 40 min each day at a decline of  
96 15 degrees, 5 days a week, for 4 weeks (60). To acclimate the mice to treadmill exercises, 1 week  
97 prior to the overuse protocol, mice underwent training: exercising for each day for 10 minutes at  
98 17 cm/s for 5 days followed by 2 days of rest. For both in vivo models, after 4 weeks since the  
99 protocol initiation, mice were euthanized and their supraspinatus tendon enthesis were harvested,  
00 soaked in PBS, and stored at -20<sup>0</sup>C.

01

### 02 **Bone morphometry and individual trabecula segmentation (ITS) analysis**

03 Bone morphometry parameters, such as bone volume/total volume (BV/TV), trabecular thickness  
04 (Tb.Th.), and trabecular spacing (Tb.Sp.) of the trabecular bone, as well as parameters obtained  
05 from ITS analysis were determined using pre-mechanical testing scans of tendon enthesis (5.0  $\mu$ m  
06 resolution). Reconstructed images were first contoured by an experienced user (MG and AA) to  
07 only include humeral head proximal to the growth plate as the region of interest (ROI). The ROI  
08 were then evaluated using a segmentation algorithm that separates cortical and trabecular bone  
09 (CTAn, Bruker). Segmented trabecular images were subjected to subsequent microstructural ITS  
10 analysis, where trabecular microstructures were decomposed to individual rod-and-plate-based  
11 trabecular microstructural parameters (46). In short, the thresholded trabecular bone images were  
12 reduced to topology-preserved structural skeletons using digital topological analysis-based  
13 skeletonization technique. Each skeletal voxel was then recovered to original topology using an  
14 iterative reconstruction method, while classifying whether the resulting trabecular structure  
15 belong to either a trabecular plate (surface) or a trabecular rod (curve) using digital topological  
16 classification methodology. Microstructural trabecular network and morphology parameters, such  
17 as plate-to-rod ratio (PR ratio), rod and plate bone volume fraction (rBV/TV and pBV/TV),

18 number density (rTb.N and pTb.N), and thickness (rTb.Th and pTb.Th) were then evaluated from  
19 resultant three-dimensional rod-and-plate classified trabecular morphology. The angular  
20 orientational analysis was also performed by evaluating each rod-and-plate angle with respect to  
21 perpendicular to the loading axis corresponding to 90 degrees abduction. The average angular  
22 distribution for each sample was normalized by the total trabecular volume within each sample's  
23 humeral head.

24

### 25 **Statistical Analysis**

26 Tendon enthesis characteristics, biomechanics results, failure properties, and bone morphometry  
27 results were compared between treatment groups using ANOVA and specific differences from  
28 control conditions were determined using Dunnett's multiple comparisons test.  $P < 0.05$  was  
29 considered significant. Failure properties were correlated to bone morphometry outcomes using  
30 Pearson correlation. All statistical analyses were performed using Prism 9 (GraphPad). All data  
31 shown as mean  $\pm$  standard deviation and results from Pearson correlation were expressed using  
32 the color map.

## 33 References

- 34 1. Z. Yin, F. Hannard, F. Barthelat, Impact-resistant nacre-like transparent materials. *Science*.  
35 **364**, 1260–1263 (2019).
- 36 2. Y. Liu, N. A. Fleck, V. S. Deshpande, A. Srivastava, High fracture toughness micro-  
37 architected materials. *J. Mech. Phys. Solids*. **143**, 104060 (2020).
- 38 3. N. A. Fleck, V. S. Deshpande, M. F. Ashby, Micro-architected materials: Past, present  
39 and future. *Proc. R. Soc. A Math. Phys. Eng. Sci.* **466**, 2495–2516 (2010).
- 40 4. M. Mirkhalaf, A. K. Dastjerdi, F. Barthelat, Overcoming the brittleness of glass through  
41 bio-inspiration and micro-architecture. *Nat. Commun.* **5**, 3166 (2014).
- 42 5. F. Barthelat, Z. Yin, M. J. Buehler, Structure and mechanics of interfaces in biological  
43 materials. *Nat. Rev. Mater.* **1**, 16007 (2016).
- 44 6. F. Barthelat, Architected materials in engineering and biology: Fabrication, structure,  
45 mechanics and performance. *Int. Mater. Rev.* **60**, 412–430 (2015).
- 46 7. R. O. Ritchie, The conflicts between strength and toughness. *Nat. Mater.* **10**, 817–822  
47 (2011).
- 48 8. G. M. Genin, S. Thomopoulos, The tendon-to-bone attachment: Unification through  
49 disarray. *Nat. Mater.* **16**, 607–608 (2017).
- 50 9. L. Rossetti, L. A. Kuntz, E. Kunold, J. Schock, K. W. Müller, H. Grabmayr, J. Stolberg-  
51 Stolberg, F. Pfeiffer, S. A. Sieber, R. Burgkart, A. R. Bausch, The microstructure and  
52 micromechanics of the tendon-bone insertion. *Nat. Mater.* **16**, 607–608 (2017).
- 53 10. S. Thomopoulos, G. R. Williams, J. A. Gimbel, M. Favata, L. J. Soslowsky, Variation of  
54 biomechanical, structural, and compositional properties along the tendon to bone insertion  
55 site. *J. Orthop. Res.* **21**, 413–419 (2003).
- 56 11. A. C. Deymier-Black, J. D. Pasteris, G. M. Genin, S. Thomopoulos, Allometry of the  
57 Tendon Enthesis: Mechanisms of Load Transfer Between Tendon and Bone. *J. Biomech.*

- 58 *Eng.* **137**, 111005 (2015).
- 59 12. S. P. Lake, K. S. Miller, D. M. Elliott, L. J. Soslowsky, Effect of fiber distribution and  
60 realignment on the nonlinear and inhomogeneous mechanical properties of human  
61 supraspinatus tendon under longitudinal tensile loading. *J. Orthop. Res.* **27**, 1596–602  
62 (2009).
- 63 13. S. Thomopoulos, J. P. Marquez, B. Weinberger, V. Birman, G. M. Genin, Collagen fiber  
64 orientation at the tendon to bone insertion and its influence on stress concentrations. *J.*  
65 *Biomech.* **39**, 1842–1851 (2006).
- 66 14. G. M. Genin, A. Kent, V. Birman, B. Wopenka, J. D. Pasteris, P. J. Marquez, S.  
67 Thomopoulos, Functional grading of mineral and collagen in the attachment of tendon to  
68 bone. *Biophys. J.* **97**, 976–985 (2009).
- 69 15. Y. Hu, V. Birman, A. Demyier-Black, A. G. Schwartz, S. Thomopoulos, G. M. Genin,  
70 Stochastic interdigitation as a toughening mechanism at the interface between tendon and  
71 bone. *Biophys. J.* **108**, 431–437 (2015).
- 72 16. A. C. Deymier, A. G. Schwartz, Z. Cai, T. L. Daulton, J. D. Pasteris, G. M. Genin, S.  
73 Thomopoulos, The multiscale structural and mechanical effects of mouse supraspinatus  
74 muscle unloading on the mature enthesis. *Acta Biomater.* **83**, 302–313 (2019).
- 75 17. M. J. Buehler, Molecular nanomechanics of nascent bone: Fibrillar toughening by  
76 mineralization. *Nanotechnology.* **18**, 295102 (2007).
- 77 18. M. S. Rashid, C. Cooper, J. Cook, D. Cooper, S. G. Dakin, S. Snelling, A. J. Carr,  
78 Increasing age and tear size reduce rotator cuff repair healing rate at 1 year. *Acta Orthop.*  
79 **88**, 606–611 (2017).
- 80 19. L. M. Galatz, C. M. Ball, S. A. Teefey, W. D. Middleton, K. Yamaguchi, The Outcome  
81 and Repair Integrity of Completely Arthroscopically Repaired Large and Massive Rotator  
82 Cuff Tears. *J. Bone Jt. Surg. - Ser. A.* **86**, 219–224 (2004).



- 83 20. J. Sartori, H. Stark, Tracking tendon fibers to their insertion – a 3D analysis of the Achilles  
84 tendon enthesis in mice. *Acta Biomater.* **120**, 146–155 (2020).
- 85 21. Y. Liu, V. Birman, C. Chen, S. Thomopoulos, G. M. Genin, Mechanisms of Bimaterial  
86 Attachment at the Interface of Tendon to Bone. *J. Eng. Mater. Technol.* **133**, 011006  
87 (2010).
- 88 22. F. Saadat, A. C. Deymier, V. Birman, S. Thomopoulos, G. M. Genin, The concentration of  
89 stress at the rotator cuff tendon-to-bone attachment site is conserved across species. *J.*  
90 *Mech. Behav. Biomed. Mater.* **62**, 24–32 (2016).
- 91 23. H. M. Shaw, M. Benjamin, Structure-function relationships of entheses in relation to  
92 mechanical load and exercise: Review. *Scand. J. Med. Sci. Sport.* **17**, 303–315 (2007).
- 93 24. J. M. Weiss, A. Arkader, L. M. Wells, T. J. Ganley, Rotator cuff injuries in adolescent  
94 athletes. *J. Pediatr. Orthop. Part B.* **22**, 133–137 (2013).
- 95 25. J. Y. Jeong, S. K. Min, K. M. Park, Y. B. Park, K. J. Han, J. C. Yoo, Location of Rotator  
96 Cuff Tear Initiation: A Magnetic Resonance Imaging Study of 191 Shoulders. *Am. J.*  
97 *Sports Med.* **46**, 649–655 (2018).
- 98 26. H. M. Kim, N. Dahiya, S. A. Teefey, W. D. Middleton, G. Stobbs, K. Steger-May, K.  
99 Yamaguchi, J. D. Keener, Location and initiation of degenerative rotator cuff tears: An  
00 analysis of three hundred and sixty shoulders. *J. Bone Jt. Surg. - Ser. A.* **92**, 829–839  
01 (2010).
- 02 27. K. Yamaguchi, K. Ditsios, W. D. Middleton, C. F. Hildebolt, L. M. Galatz, S. A. Teefey,  
03 The demographic and morphological features of rotator cuff disease: A comparison of  
04 asymptomatic and symptomatic shoulders. *J. Bone Jt. Surg. - Ser. A.* **88**, 1699–704 (2006).
- 05 28. M. I. Danto, S. L. Woo, The mechanical properties of skeletally mature rabbit anterior  
06 cruciate ligament and patellar tendon over a range of strain rates. *J. Orthop. Res.* **11**, 58–67  
07 (1993).

- 08 29. H. A. Lynch, W. Johannessen, J. P. Wu, A. Jawa, D. M. Elliott, Effect of Fiber Orientation  
09 and Strain Rate on the Nonlinear Uniaxial Tensile Material Properties of Tendon. *J.*  
10 *Biomech. Eng.* **125**, 726 (2003).
- 11 30. J. L. Zitnay, G. S. Jung, A. H. Lin, Z. Qin, Y. Li, S. M. Yu, M. J. Buehler, J. A. Weiss,  
12 Accumulation of collagen molecular unfolding is the mechanism of cyclic fatigue damage  
13 and failure in collagenous tissues. *Sci. Adv.* **6**, eaba2795 (2020).
- 14 31. J. L. Zitnay, Y. Li, Z. Qin, B. H. San, B. Depalle, S. P. Reese, M. J. Buehler, S. M. Yu, J.  
15 A. Weiss, Molecular level detection and localization of mechanical damage in collagen  
16 enabled by collagen hybridizing peptides. *Nat. Commun.* **8**, 14913 (2017).
- 17 32. S. P. McCully, N. Kumar, M. D. Lazarus, A. R. Karduna, Internal and external rotation of  
18 the shoulder: Effects of plane, end-range determination, and scapular motion. *J. Shoulder*  
19 *Elb. Surg.* **14**, 605–610 (2005).
- 20 33. M. D. Newton, A. A. Davidson, R. Pomajzl, J. Seta, M. D. Kurdziel, T. Maerz, The  
21 influence of testing angle on the biomechanical properties of the rat supraspinatus tendon.  
22 *J. Biomech.* **49**, 4159–4163 (2016).
- 23 34. K. Lindblom, On pathogenesis of ruptures of the tendon aponeurosis of the shoulder joint.  
24 *Acta radiol.* **20**, 564–577 (1939).
- 25 35. C. Y. Huang, V. M. Wang, R. J. Pawluk, J. S. Bucchieri, W. N. Levine, L. U. Bigliani, V.  
26 C. Mow, E. L. Flatow, Inhomogeneous mechanical behavior of the human supraspinatus  
27 tendon under uniaxial loading. *J. Orthop. Res.* **23**, 924–930 (2005).
- 28 36. H. Ouellette, J. Labis, M. Bredella, W. E. Palmer, K. Sheah, M. Torriani, Spectrum of  
29 shoulder injuries in the baseball pitcher. *Skeletal Radiol.* **37**, 491–498 (2008).
- 30 37. O. A. Tertuliano, J. R. Greer, The nanocomposite nature of bone drives its strength and  
31 damage resistance. *Nat. Mater.* **15**, 1195–1202 (2016).
- 32 38. C. Gerber, J. G. Snedeker, D. Baumgartner, A. F. Viehöfer, Supraspinatus tendon load

- 33 during abduction is dependent on the size of the critical shoulder angle: A biomechanical  
34 analysis. *J. Orthop. Res.* **32**, 952–957 (2014).
- 35 39. Y. Liu, S. Thomopoulos, C. Chen, V. Birman, M. J. Buehler, G. M. Genin, Modelling the  
36 mechanics of partially mineralized collagen fibrils, fibres and tissue. *J. R. Soc. Interface.*  
37 **11**, 20130835 (2014).
- 38 40. A. C. Deymier, Y. An, J. J. Boyle, A. G. Schwartz, V. Birman, G. M. Genin, S.  
39 Thomopoulos, A. H. Barber, Micro-mechanical properties of the tendon-to-bone  
40 attachment. *Acta Biomater.* **56**, 25–35 (2017).
- 41 41. I. M. Basalo, F. H. Chen, C. T. Hung, G. A. Ateshian, Frictional response of bovine  
42 articular cartilage under creep loading following proteoglycan digestion with  
43 chondroitinase ABC. *J. Biomech. Eng.* **128**, 131–4 (2006).
- 44 42. O. G. Andriotis, S. Desissaire, P. J. Thurner, Collagen Fibrils: Nature’s Highly Tunable  
45 Nonlinear Springs. *ACS Nano.* **12**, 3671–3680 (2018).
- 46 43. D. R. Carter, *Calcif. Tissue Int.*, in press, doi:10.1007/BF02406129.
- 47 44. L. B. Meakin, J. S. Price, L. E. Lanyon, The contribution of experimental in vivo models to  
48 understanding the mechanisms of adaptation to mechanical loading in bone. *Front.*  
49 *Endocrinol. (Lausanne).* **5**, 154 (2014).
- 50 45. A. M. Tataru, J. H. Lipner, R. Das, H. M. Kim, N. Patel, E. Ntouvali, M. J. Silva, S.  
51 Thomopoulos, The role of muscle loading on bone (re)modeling at the developing enthesis.  
52 *PLoS One.* **9**, e97375 (2014).
- 53 46. X. S. Liu, P. Sajda, P. K. Saha, F. W. Wehrli, G. Bevill, T. M. Keaveny, X. E. Guo,  
54 Complete volumetric decomposition of individual trabecular plates and rods and its  
55 morphological correlations with anisotropic elastic moduli in human trabecular bone. *J.*  
56 *Bone Miner. Res.* **23**, 223–35 (2008).
- 57 47. E. R. Cadet, J. W. Hsu, W. N. Levine, L. U. Bigliani, C. S. Ahmad, The relationship

- 58 between greater tuberosity osteopenia and the chronicity of rotator cuff tears. *J. Shoulder*  
59 *Elb. Surg.* **17**, 73–77 (2008).
- 50 48. F. Barthelat, H. D. Espinosa, An experimental investigation of deformation and fracture of  
51 nacre-mother of pearl. *Exp. Mech.* **47**, 311–324 (2007).
- 52 49. V. Imbeni, J. J. Kruzic, G. W. Marshall, S. J. Marshall, R. O. Ritchie, The dentin-enamel  
53 junction and the fracture of human teeth. *Nat. Mater.* **4**, 229–232 (2005).
- 54 50. F. Marin, N. Le Roy, B. Marie, The formation and mineralization of mollusk shell. *Front.*  
55 *Biosci. - Sch.* **4**, 1099–125 (2012).
- 56 51. K. Livanov, H. Jelitto, B. Bar-On, K. Schulte, G. A. Schneider, D. H. Wagner, Tough  
57 alumina/polymer layered composites with high ceramic content. *J. Am. Ceram. Soc.* **98**,  
58 1285–1291 (2015).
- 59 52. B. Han, K. K. Qin, B. Yu, Q. C. Zhang, C. Q. Chen, T. J. Lu, Design optimization of foam-  
70 reinforced corrugated sandwich beams. *Compos. Struct.* **130**, 51–62 (2015).
- 71 53. S. Khandelwal, T. Siegmund, R. J. Cipra, J. S. Bolton, Transverse loading of cellular  
72 topologically interlocked materials. *Int. J. Solids Struct.* **49**, 2394–2403 (2012).
- 73 54. M. Carlesso, R. Giacomelli, T. Krause, A. Molotnikov, D. Koch, S. Kroll, K. Tushtev, Y.  
74 Estrin, K. Rezwan, Improvement of sound absorption and flexural compliance of porous  
75 alumina-mullite ceramics by engineering the microstructure and segmentation into  
76 topologically interlocked blocks. *J. Eur. Ceram. Soc.* **33**, 2549–2558 (2013).
- 77 55. M. B. Schmidt, V. C. Mow, L. E. Chun, D. R. Eyre, Effects of proteoglycan extraction on  
78 the tensile behavior of articular cartilage. *J. Orthop. Res.* **8**, 353–63 (1990).
- 79 56. S. Cavelier, A. K. Dastjerdi, M. D. McKee, F. Barthelat, Bone toughness at the molecular  
80 scale: A model for fracture toughness using crosslinked osteopontin on synthetic and  
81 biogenic mineral substrates. *Bone* **110**, 304–311 (2018).
- 82 57. I. Kurtaliaj, M. Golman, A. C. Abraham, S. Thomopoulos, Biomechanical Testing of

- 33 Murine Tendons. *J. Vis. Exp.* (2019), doi:10.3791/60280.
- 34 58. S. W. Linderman, M. Golman, T. R. Gardner, V. Birman, W. N. Levine, G. M. Genin, S.  
35 Thomopoulos, Enhanced tendon-to-bone repair through adhesive films. *Acta Biomater.* **70**,  
36 165–176 (2018).
- 37 59. F. Fang, S. P. Lake, Multiscale mechanical integrity of human supraspinatus tendon in  
38 shear after elastin depletion. *J. Mech. Behav. Biomed. Mater.* **63** 443-455 (2016).
- 39 60. A. C. Abraham, S. A. Shah, M. Golman, L. Song, X. Li, I. Kurtaliaj, M. Akbar, N. L.  
40 Millar, Y. Abu-Amer, L. M. Galatz, S. Thomopoulos, Targeting the NF-kB signaling  
41 pathway in chronic tendon disease. *Sci. Transl. Med.* **11**, eaav4319 (2019).
- 42 61. M. M. Panjabi, A. A. White, W. O. Southwick, Mechanical properties of bone as a function  
43 of rate of deformation. *J. Bone Joint Surg. Am.* **55**, 322-30 (1973).
- 44 62. T. M. Wright, W. C. Hayes, Tensile testing of bone over a wide range of strain rates:  
45 effects of strain rate, microstructure and density. *Med. Biol. Eng.* **14**, 671 (1976).
- 46  
47

## 48 **Acknowledgments**

49 The project was funded by National Institute of Health (NIH) U01-EB016422 and R01-  
50 AR055580. We acknowledge Fei Fang with the help on *in vivo* degeneration models. We  
51 acknowledge Vedran Nedelovski, Amir Davood Elmi and Martin Handelshauer for providing  
52 Electron Microscopy images of failed tendon enthesis, which were obtained at the University  
53 Service Centre for Transmission Electron Microscopy, TU Wien, Austria.

54

55 **Author contributions:** M.G., G.M.G., S.T., and V.B., designed the research. M.G., A.C.A., I.K.,  
56 and B.P.M., developed protocols and performed microcomputed tomography. A.G.S. obtained  
57 histological slides. M.G. carried out mechanical testing, confocal microscopy, and contrast-

08 enhanced microcomputed tomography. P.J.T. obtained scanning electron microscopy images.  
09 Y.J.H., and X.E.G., performed ITS analysis. M.G., G.M.G., and S.T., analyzed the data and wrote  
10 the paper. All authors reviewed and revised the manuscript.

11

12 **Competing interests:** Authors declare that they have no competing interests.

13

14 **Data and materials availability:** All data is available in the main text or the supplementary  
15 materials. The custom codes used in this study, including the positional recruitment numerical  
16 model, are available from the authors upon request.

17 **Figures**

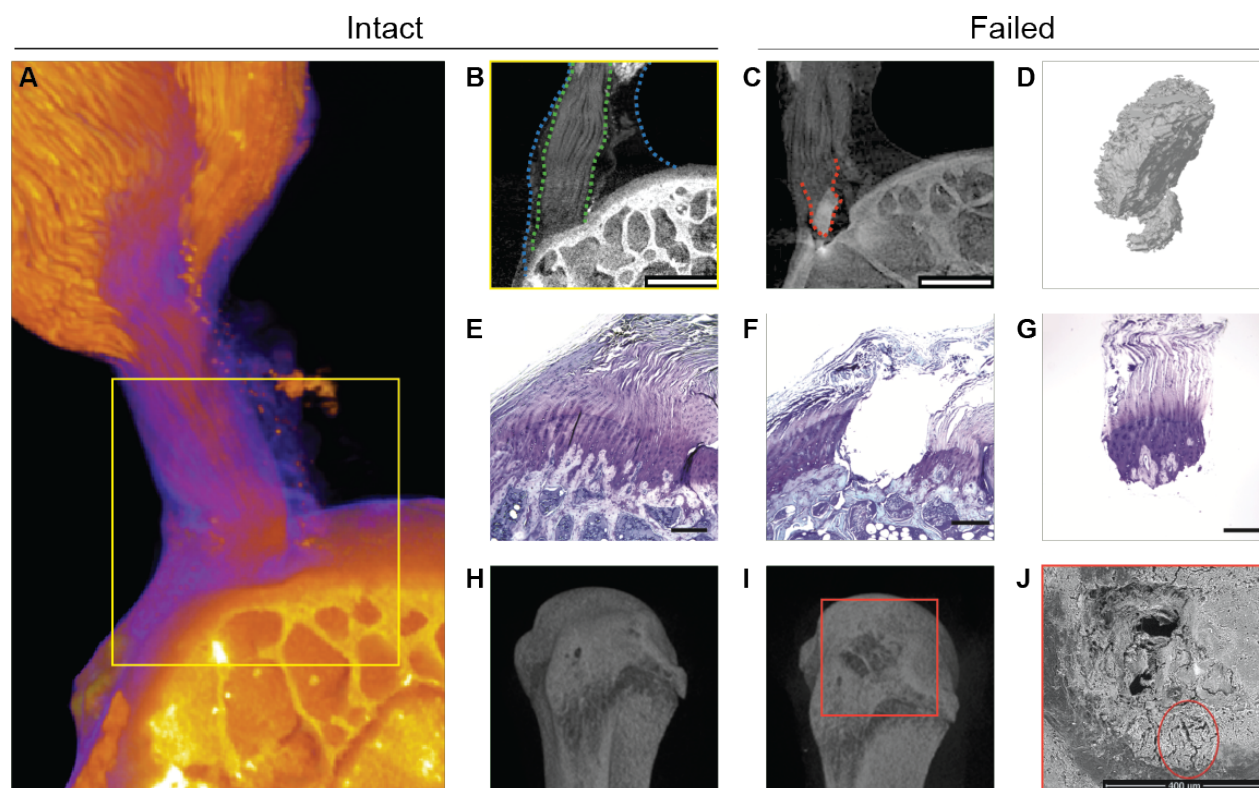

18

19 **Fig. 1. The tendon enthesis exhibits a fibrous architected material system that fails via**  
20 **bony avulsion under quasi-static loading.**

21 **(A)-(C)**, Mercury (II) chloride-stained contrast enhanced high-resolution microCT imaging  
22 revealed that, hidden within the well-known larger apparent attachment footprint area, is a  
23 smaller, much denser primary insertion site where tendon fibers insert directly into the bone.  
24 Imaging revealed that, under quasi-static loading, only 47.4+/-5.1% of the apparent attachment  
25 site was avulsed, revealing a previously unknown primary attachment. **(A)** Three-dimensional  
26 volume rendering of representative intact enthesis. **(B)** Magnified cross sectional view of yellow  
27 box in a; within blue dotted lines outline apparent enthesis and within green dotted lines outline  
28 dense primary insertion. (scale: 500 μm). **(C)** Post-failure imaging showing avulsed bony  
29 fragment at primary insertion site, outlined with a red dotted line. (scale: 500 μm). **(D)** Three-  
30 dimensional representation of avulsed fragment showing portions of trabeculae at the failure site.

31 **(E)-(G)**, Histological sections of (E) intact, and (F)-(G) failed enthesis stained with toluidine blue  
32 (scale: 250  $\mu\text{m}$ ). **(H)-(I)**, Three-dimensional reconstruction from conventional microCT imaging  
33 of a representative (H) intact and (I) failed enthesis sample. **(J)** Scanning electron microscopy of  
34 the failure site showing crack propagation around the avulsion site, outlined by a red circle (scale  
35 400  $\mu\text{m}$ ).

36



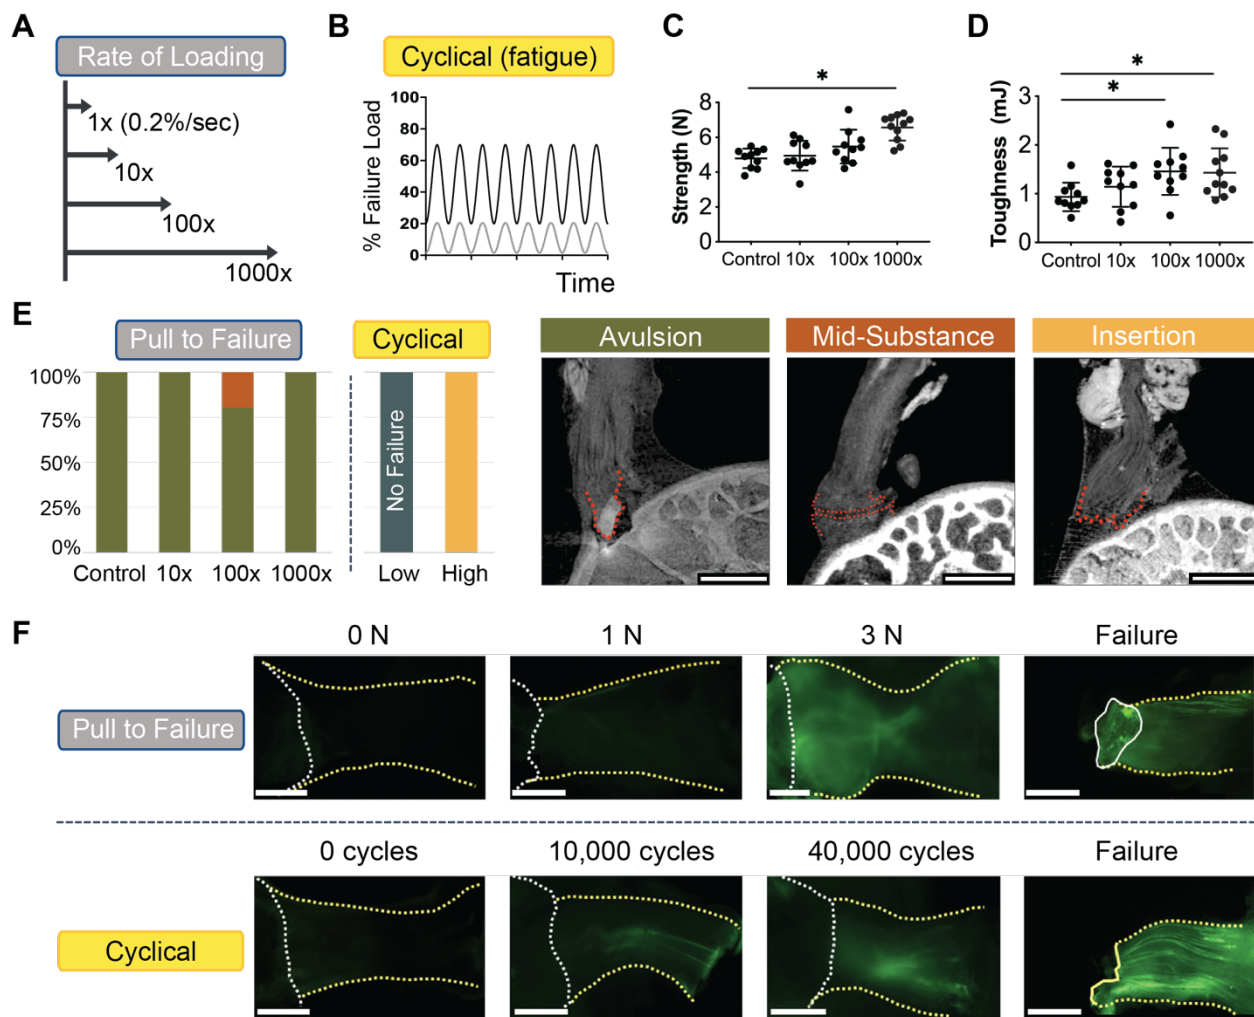

**Fig. 2. Multiscale toughening mechanisms enable the entheses to exhibit distinct failure modes under varying loading conditions.**

(A)-(B), To examine effect of loading on failure mode, samples were loaded (A) across a range of loading rates to simulate acute injuries or (B) loaded cyclically to simulate degenerative loading.

(C) Enthesis strength (i.e., failure load) and (D) entheses toughness (i.e., energy absorption)

increased with the loading rate. (\*\*\*\*  $p < 0.0001$ , \*  $p < 0.05$ , ANOVA followed by the Dunnett's

multiple comparison test). (E) There were three distinct failure modes, depending on the loading

regime: bone avulsion, tendon mid-substance, and tendon-bone interface (insertion failure) (scale: 500  $\mu\text{m}$ ). Under monotonic loading, most samples failed by bony avulsion failures. Under "high"

cyclical loading (20%-70% failure force), all samples failed at the insertion. Under "low" cyclical

loading (1%-20% failure force) samples did not fail, even after 100,000 cycles. (F) F-CHP

49 fluorescence intensity, indicative of collagen damage accumulation, increased with the level of  
50 applied load and with the number of cycles. For quasi-statically loaded samples (F, top), there  
51 was little to no fluorescent signal in the low force group (1N-2N), followed by increased staining  
52 near the attachment site at higher loads (3N and failure). For cyclically loaded samples (F,  
53 bottom), F-CHP staining was initially concentrated in a few fibers near the tendon mid-substance  
54 (10K-40K cycles) and ultimately propagated down the entire tendon in concentrated bands (scale:  
55 500  $\mu\text{m}$ ).

56

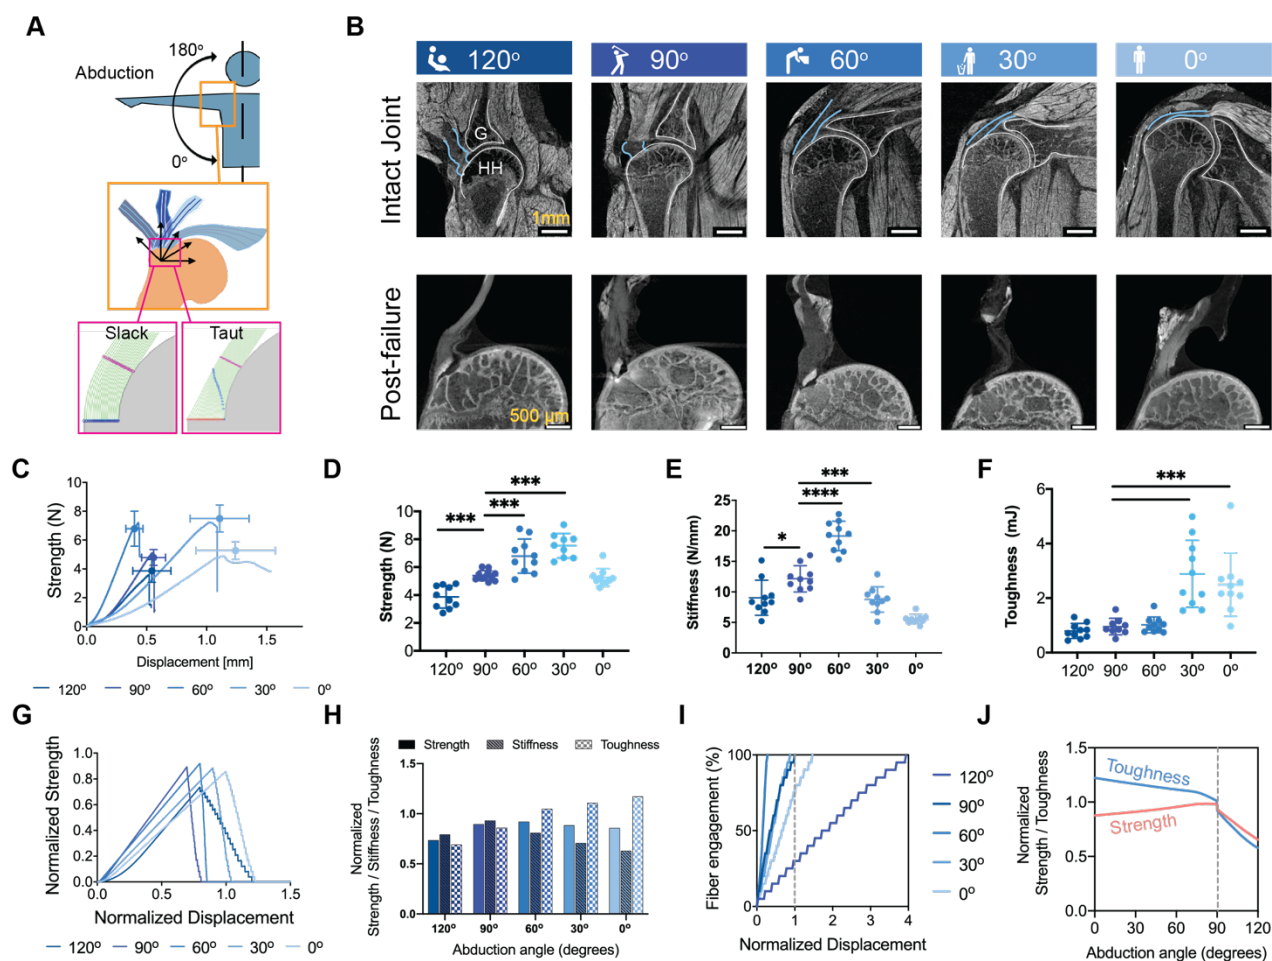

57

58 **Fig. 3. Multiscale toughening mechanisms enable the entheses to exhibit distinct failure**  
 59 **modes under varying loading conditions.**

60 **(A)** Samples were tested at varying angles of abduction (A, top) and a fiber recruitment model  
 61 was developed to examine structural and positional contributions to enthesis toughness (A,  
 62 bottom). **(B)** Contrast-enhanced microCT of intact (b, top row) and failed (b, bottom row) mouse  
 63 glenohumeral joints at each abduction angle (G: glenoid, HH: humeral head). The supraspinatus  
 64 tendon (b, top row, outlined in blue) was straight at low abduction angles (0°-30°) and buckled at  
 65 high abduction angles (90°-120°). **(C)-(F)**, There were significant differences in the attachment  
 66 mechanical behavior and failure properties when samples were tested quasistatically at varying  
 67 angles *ex vivo* (C, strength (failure force) vs. displacement plot; D, strength; E, stiffness; F,  
 68 toughness) (\*  $p < 0.05$ , \*\*  $p < 0.01$ , \*\*\*  $p < 0.001$ , \*\*\*\*  $p < 0.0001$ , ANOVA followed by the  
 69 Dunnett's multiple comparison test). **(G)-(J)** A positional recruitment simulation, in which fiber

70 interactions were steric and linear, reproduced experimentally-observed entheses mechanics as a  
71 function of abduction angle. *In silico* (G) strength vs. displacement and (H) strength, stiffness,  
72 toughness results normalized against the case when fibers were pulled uniaxially without the  
73 geometric constraints. (I) The relationship between fiber engagement and displacement depended  
74 on abduction angle, demonstrating that the energy absorbed in re-orienting and engaging fibers  
75 drove the toughening behavior of the attachment. (J) Enthesis architecture was optimized for  
76 toughness: normalized toughness was generally higher than normalized strength through most  
77 abduction angles.

78

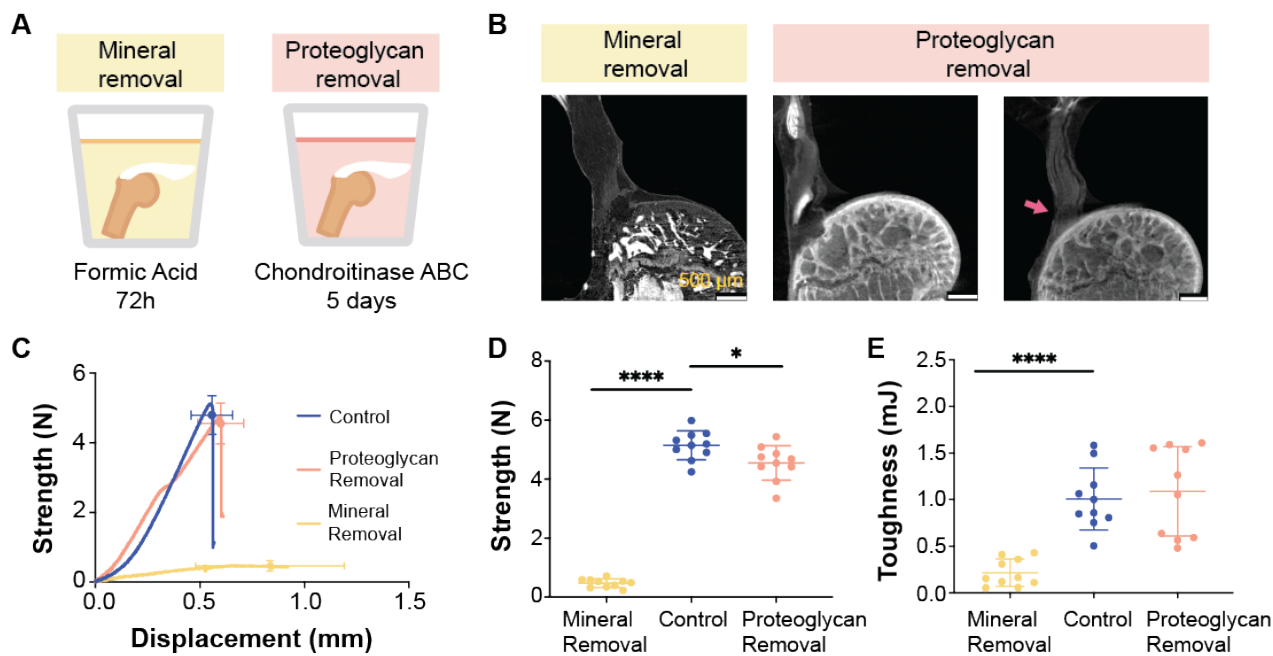

79

80 **Fig. 4. Tendon enthesis composition drives enthesis mechanical properties.**

81 **(A)** To examine compositional contributions to tendon-to-bone attachment strength and  
82 toughness, samples were immersed in decalcifying agent to completely remove mineral (A, left)  
83 or in Chondroitinase ABC for 5 days to chemically digest proteoglycans (A, right). **(B)** Post-  
84 failure contrast enhanced microCT scanning showed that loss of mineral or proteoglycan did not  
85 significantly alter the failure modes of the tendon enthesis. Most samples failed via bone  
86 avulsion, while a small number of samples depleted in proteoglycans failed at the edge of  
87 unmineralized fibrocartilage (pink arrow) (scale: 500  $\mu$ m). **(C)-(E)**, Quasi-static mechanical  
88 testing revealed significant differences in mechanical behavior of tendon entheses when mineral  
89 was removed. **(C)** Strength (failure force) vs. displacement behavior. **(D)** Removal of mineral led  
90 to a dramatic decrease in strength; removal of proteoglycan led to a relatively small decrease in  
91 strength. **(E)** Removal of mineral led to a significant decrease in toughness; removal of  
92 proteoglycan did not affect enthesis toughness. (\*  $p < 0.05$ , \*\*\*\*  $p < 0.0001$ , ANOVA followed by  
93 the Dunnett's multiple comparison test).

94

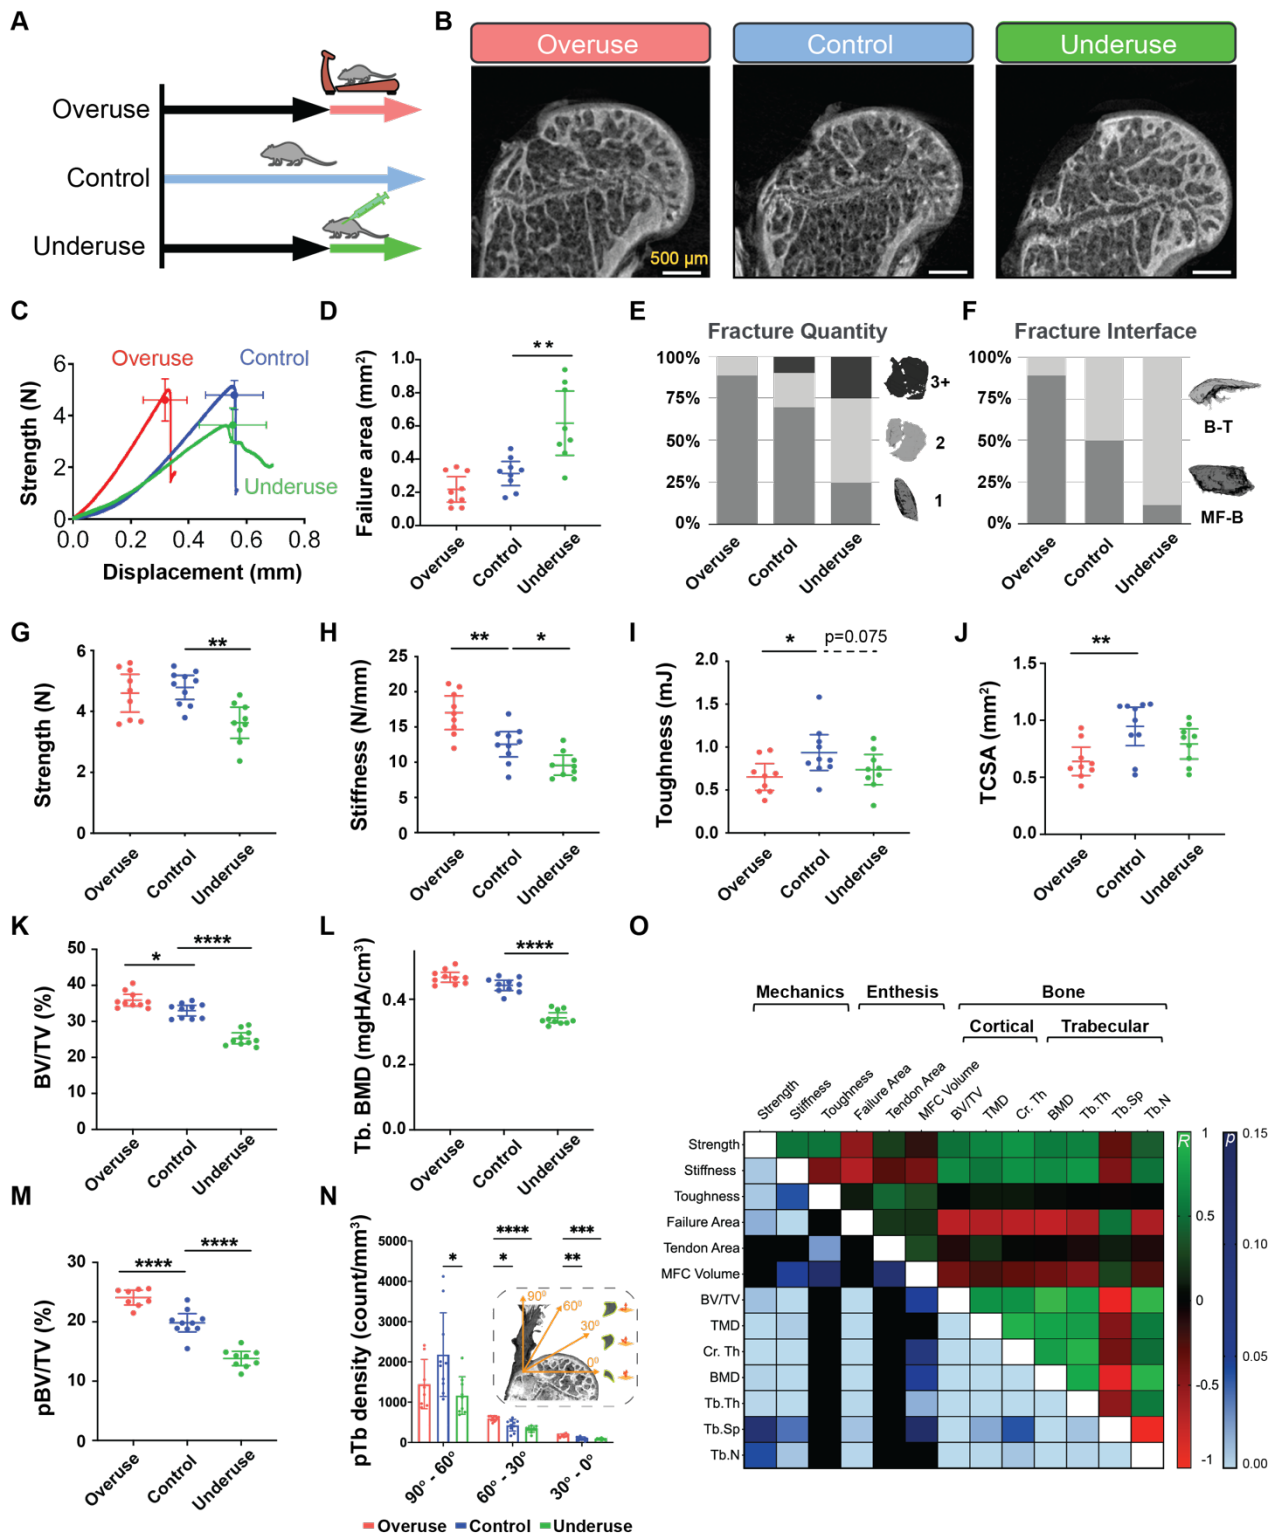

**Fig. 5. The tendon enthesis actively adapts its architecture in vivo by modifying mineral composition.**

(A) 10-week-old mice were subjected to two degeneration models: underuse degeneration was induced via muscle paralysis and overuse degeneration was achieved through downhill treadmill

00 running for 4 weeks. **(B)** Post-failure contrast enhanced microCT imaging revealed that  
01 pathological entheses exhibited exclusively avulsion-type failures under tensile mechanical  
02 testing (scale: 500  $\mu\text{m}$ ). **(C)-(J)**, Physiological *in vivo* degeneration models reduced the ability of  
03 the enthesis to protect against failure. **(D)** Failure area, **(E)** avulsed fragment quantity, and **(F)**  
04 failure interfaces were affected by enthesis pathology. Underuse degeneration led to **(G)** lower  
05 strength ( $p<0.01$ ), **(H)** lower stiffness ( $p<0.05$ ), and **(I)** trended with decreased toughness  
06 ( $p=0.075$ ) compared to that of control. Overuse degeneration decreased **(J)** tendon cross-sectional  
07 area ( $p<0.01$ ), **(H)** stiffened the enthesis ( $p<0.01$ ), and **(I)** significantly reduced toughness  
08 compared to control ( $p<0.05$ ). **(K) – (L)**, Bone morphometric analysis revealed that underuse led  
09 to **(K)** reduced bone volume (BV/TV) ( $p<0.0001$ ) and **(L)** reduced bone mineral density (BMD)  
10 in the bone underlying the attachment ( $p<0.0001$ ). **(M)** The volume of load bearing trabecular  
11 plates (pBV/TV) increased significantly ( $p<0.0001$ ) due to overuse and decreased significantly  
12 ( $p<0.0001$ ) due to underuse, with significant changes in their **(N)** orientations ( $p<0.01$ , 2-way  
13 ANOVA followed by Dunnett’s multiple comparison test). **(O)** Enthesis strength correlated with  
14 BMD ( $R=0.60$ ,  $p<0.001$ ), cortical thickness ( $R=0.69$ ,  $p<0.001$ ), and trabecular plate thickness  
15 ( $R=0.44$ ,  $p<0.001$ ). Enthesis toughness correlated with tendon cross-sectional area ( $R=0.44$ ,  
16  $p<0.01$ , Pearson correlation). (\*  $p<0.05$ , \*\*  $p<0.01$ , \*\*\*  $p<0.001$ , \*\*\*\*  $p<0.0001$ , ANOVA  
17 followed by the Dunnett’s multiple comparison test unless otherwise reported).

18

19



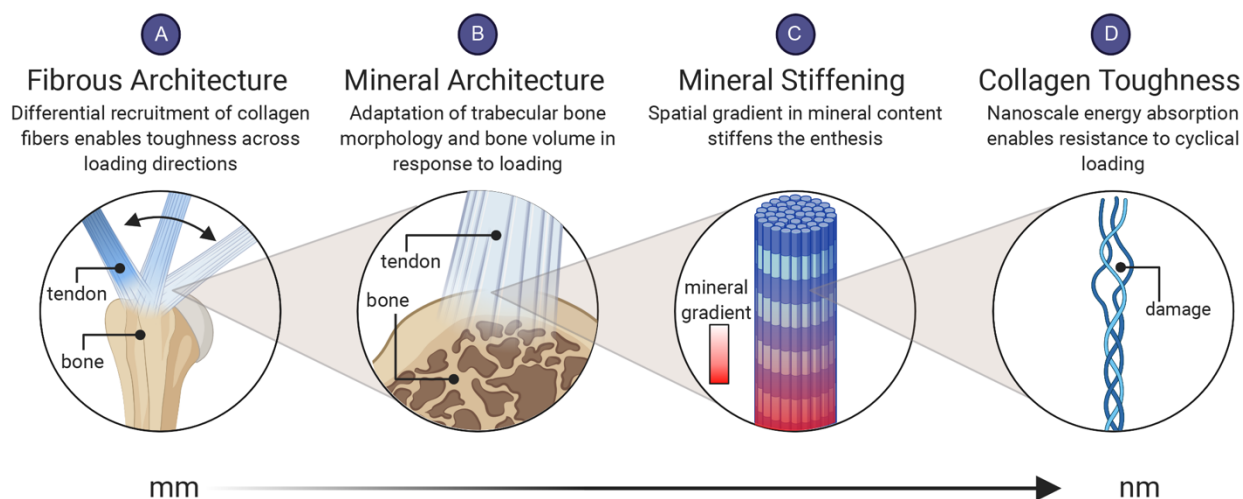

20

21 **Fig. 6. The fibrous and mineral architectures of the tendon enthesis provide multiscale**

22 **toughening mechanisms for a resilient attachment between tendon and bone.**

23 Enthesis toughness is achieved over multiple length scales through unique fibrous and mineral

24 architectures. At the millimeter length scale **(A)** the fibrous architecture of the tendon enthesis

25 allows for fiber recruitment and re-orientation to optimize toughness over strength across a range

26 of loading directions. At the micrometer length scale **(B)** the enthesis actively adapts its mineral

27 architecture to maintain its strength along the axis of loading. At the micrometer-to-nanometer

28 length scale **(C)** a spatial gradient in mineral across the enthesis reduced stress concentrations

29 *(16)*. At the nanometer length scale **(D)** collagen damage localization protects against damage

30 prorogating to higher length scales.
